# Supplementary material for: A Bursaphelenchus xylophilus effector BxICD1 inducing plant cell death, concurrently contributes to nematode virulence and migration
Source: Front Plant Sci. 2024 Feb 28;15:1357141. doi: 10.3389/fpls.2024.1357141 (PMC10933036; doi:10.3389/fpls.2024.1357141)
Supplement: Supplementary file 4 [file Table_1.xlsx]

## Sheet: Supplementary Table 1
Supplementary Table 1 Primers used in this study
Gene Names	Primer Names	Sequences(5'-3')	Purpose
BxUBI2	qBxUBI2-F	TGTATCAAGGTGGATACTTCAAG	RT-qPCR
	qBxUBI2-R	CCGTACACTCTGGGTTGGATT
BXY_1685000	qFAR-F	GAGCCAGCTTGGGGTTTTTG
	qFAR-R	GCAACACGGAGTTCGTTGTA
BXY_0304900（BxICD1）	qBxICD1-F	AATTGATTCGTTGAAAGGA
	qBxICD1-R	CATTGCTCTCCGTAGTAG
BXY_0917700	qBXY_0917700-F	TACGGAAGACAGACGGTATA
	qBXY_0917700-R	TGTTCCTCTTGCTCATTGT
BXY_1127400	qBXY_1127400-F	ATGTCATTCGGCGTCATG
	qBXY_1127400-R	GATCAGTTTCAGTTTCACG
BXY_1288400	qBXY_1288400-F	TAACATATCGGACATTGC
	qBXY_1288400-R	ATAAGTTGAACGGTAACG
BXY_1398900	qBXY_1398900-F	AGTGATATTGGTCATCTTCTT
	qBXY_1398900-R	GTAGGCTTGTTGTAGGTT
BXY_1529800	qBXY_1529800-F	CTACAACAAGCAGCATAA
	qBXY_1529800-R	AAAGACTTCCACATTCAG
BXY_1692800	qBXY_1692800-F	AAGACGGTCAACTTAAAG
	qBXY_1692800-R	TCTCATAGAAGCATCCAT
NbBAK1	qNbBAK1-F	GAGGTGGGAGGAATGGCAAA
	qNbBAK1-R	TTGGCCCCGACAATTCATCT
NbSOBIR1	qNbSOBIR1-F	ATCGCTGGAGGAGTTCCTGCAGG
	qNbSOBIR1-R	CCACGTACAGCAGTGGTAACAT
NbEF1α	NbEF1α-F	GTATGCCTGGGTGCTTGAC
	NbEF1α-R	ACAGGGACAGTTCCAATACCA
NbAcre31	NbAcre31-F	AATTCGGCCATCGTGATCTTGGTC
	NbAcre31-R	GAGAAACTGGGATTGCCTGAAGGA
NbCyp71D20	NbCyp71D20-F	GTTGACGCCATTGTTGAG
	NbCyp71D20-R	ATCTTCGCCTCCTAATGC
BxICD1	BxICD1-F	ATGAAGTTGCTGCTGGTGTTG	Gene amplification
	BxICD1-R	GTAATATTCATGAGGGCATAAGT
BXY_0668400	BXY_0668400-F	ATGCGTGGGTTTGTGCTGTTA
	BXY_0668400-R	CTTGAGGTTTCCGCGAATTC
BXY_0811300	BXY_0811300-F	ATGCTTCGGGTTGTCACTTGT
	BXY_0811300-R	GATGGCTGGCTGAGAGCG
BXY_0917700	BXY_0917700-F	ATGAAATTGTATTTTCTAATCGC
	BXY_0917700-R	ACGGAAGGGGAGTCTCTC
BXY_1127400	BXY_1127400-F	ATGTCATTCGGCGTCATGAA
	BXY_1127400-R	GGCAATCCGCTTCTTGGC
BXY_1260200	BXY_1260200-F	ATGAAACTTGCCCTACTGTGT
	BXY_1260200-R	AGATTTATCTGCTTGTGGCTTT
BXY_1288400	BXY_1288400-F	ATGAAGTTGCTCGTGCTTTGT
	BXY_1288400-R	TGTACTTTTGCCAAGAGTCGA
BXY_1386100	BXY_1386100-F	ATGACAAAACTAGCGCTTATTG
	BXY_1386100-R	TCCCCATCCCATGCCGCC
BXY_1398900	BXY_1398900-F	ATGAGAGTGATATTGGTCATC
	BXY_1398900-R	TCCAATACCTCCAGCATATCC
BXY_1590000	BXY_1590000-F	ATGAAAATAATTGCACTATTTCTA
	BXY_1590000-R	AGGGAGATTCCTTTTGGCC
BxICD1	pBxICD1-F	cacgggggactcttgaATGAAGTTGCTGCTGGTGTTG	Plant expression vector construction
	pBxICD1noSP-F	cacgggggactcttgaATGGAAACGTGGTCGGTGGCT
	pBxICD1-Flag-R	caccaattcacacgtgTTACTTATCGTCGTCATCCTTGTAATCGTAATATTCATGAGGGCATAAGT
	pBxICD1-GFP-R	cgcccttgctcaccatGTAATATTCATGAGGGCATAAGT
BXY_0668400	p0668400-F	cacgggggactcttgaATGCGTGGGTTTGTGCTGTTA
	p0668400noSP-F	cacgggggactcttgaATGGACAAGCAGGCGGAAATAAT
	p0668400-GFP-R	cgcccttgctcaccatcttgaggtttccgcgaattc
BXY_0811300	p0811300-F	cacgggggactcttgaATGCTTCGGGTTGTCACTTGT
	p0811300noSP-F	cacgggggactcttgaATGTTGGAGGTGCCAGCGGGT
	p0811300-GFP-R	cgcccttgctcaccatgatggctggctgagagcg
BXY_0917700	p0917700-F	cacgggggactcttgaATGAAATTGTATTTTCTAATCGC
	p0917700noSP-F	cacgggggactcttgaATGAGACAGACGGTATACTTTCAA
	p0917700-GFP-R	cgcccttgctcaccatacggaaggggagtctctc
BXY_1127400	p1127400-F	cacgggggactcttgaATGTCATTCGGCGTCATGAA
	p1127400noSP-F	cacgggggactcttgaATGCAGACCAACCCCGAATCTTC
	p1127400-GFP-R	cgcccttgctcaccatggcaatccgcttcttggc
BXY_1260200	p1260200-F	cacgggggactcttgaATGAAACTTGCCCTACTGTGT
	p1260200noSP-F	cacgggggactcttgaATGTCGGAAGCCAAGCCCAAGA
	p1260200-GFP-R	cgcccttgctcaccatagatttatctgcttgtggcttt
BXY_1288400	p1288400-F	cacgggggactcttgaATGAAGTTGCTCGTGCTTTGT
	p1288400noSP-F	cacgggggactcttgaATGAGCCCGAAGCCATCCAGC
	p1288400-GFP-R	cgcccttgctcaccattgtacttttgccaagagtcga
BXY_1386100	p1386100-F	cacgggggactcttgaATGACAAAACTAGCGCTTATTG
	p1386100noSP-F	cacgggggactcttgaATGCAATGGGGAATGGGTCCC
	p1386100-GFP-R	cgcccttgctcaccattccccatcccatgccgcc
BXY_1398900	p1398900-F	cacgggggactcttgaATGAGAGTGATATTGGTCATC
	p1398900noSP-F	cacgggggactcttgaATGTCACTTTTTAAATTAAATTACC
	p1398900-GFP-R	cgcccttgctcaccattccaatacctccagcatatcc
BXY_1590000	p1590000-F	cacgggggactcttgaATGAAAATAATTGCACTATTTCTA
	p1590000noSP-F	cacgggggactcttgaATGGGATTGGACGATGAGGCC
	p1590000-GFP-R	cgcccttgctcaccatagggagattccttttggcc
	RNAi-T7BxICD1-F	taatacgactcactatagggAATTGATTCGTTGAAAGGA	In vitro RNAi
	RNAi-BxICD1-R	CATTGCTCTCCGTAGTAG
	RNAi-BxICD1-F	AATTGATTCGTTGAAAGGA
	RNAi-T7BxICD1-R	taatacgactcactatagggCATTGCTCTCCGTAGTAG
	RNAi-T7eGFP-F	taatacgactcactatagggagcagcacgacttcttcaag
	RNAi-eGFP-R	ttgatgccgttcttctgctt
	RNAi-eGFP-F	agcagcacgacttcttcaag
	RNAi-T7eGFP-R	taatacgactcactatagggttgatgccgttcttctgctt
	qRT-BxICD1-F1	AAGGAAGACATCAAATCAAAGT
	qRT-BxICD1-R1	GTCGTCGTATTCGGAGAT
	spBxICD1-EcoRI(suc2)-F	AATTTTAATTAAGAATTC ATGAAGTTGCTGCTGGTGTT	Functional evaluation of the signal peptides
	spBxICD1-XhoI(suc2)-30R	TATAGGGAGAACCTCGAG GGCCTGCACTGTGCCAG
	Avr1b-EcoRI(suc2)-F	AATTTTAATTAAGAATTCatgcgtctatcttttg
	Avr1b-XhoI(suc2)-30R	TATAGGGAGAACCTCGAGgatattggtttcgtcg
	ISH-BxICD1-F	AATTGATTCGTTGAAAGGA	In situ hybridization
	ISH-BxICD1-R	CATTGCTCTCCGTAGTAG

## Sheet: Supplementary Table 2
Supplementary Table 2 Summary table of pine Bursaphelenchus xylophilus transcriptome data quality
sample	raw_reads	clean_reads	error_rate	Q20	Q30	GC_pct	total_map
Bx_Pe1	44910350	43612208	0.03	97.81	93.82	48.45	40158237(92.08%)
Bx_Pe2	46613442	45476850	0.02	97.99	94.22	48.51	41974662(92.3%)
Bx_Pm1	44002542	43233524	0.03	97.77	93.67	48.57	39846899(92.17%)
Bx_Pm2	45618024	44803140	0.03	97.8	93.69	48.62	41348555(92.29%)

## Sheet: Supplementary Table 3
The name of 31 Bursaphelenchus xylophilus candidate effectors gene
BXY_0019200
BXY_0194500
BXY_0304900
BXY_0305000
BXY_0462000
BXY_0545000
BXY_0668400
BXY_0811300
BXY_0917700
BXY_0919200
BXY_1144700
BXY_1144800
BXY_1145100
BXY_1145300
BXY_1260200
BXY_1288400
BXY_1309200
BXY_1351700
BXY_1357300
BXY_1386000
BXY_1386100
BXY_1386200
BXY_1398900
BXY_1441400
BXY_1518000
BXY_1529700
BXY_1529800
BXY_1529900
BXY_1127400
BXY_1544500
BXY_1590000
